# Supplementary material for: The fecal resistome of dairy cattle is associated with diet during nursing
Source: PubMed Central journal article supplement (PMC6765000; doi:10.1038/s41467-019-12111-x), 2019-09-27
Supplement: 41467_2019_12111_MOESM3_ESM.pdf [file 41467_2019_12111_MOESM3_ESM.pdf]

## **Description of Additional Supplementary Files**

File Name: Supplementary Data 1

Description: List of ARGs observed in this study.

File Name: Supplementary Data 2

Description: List of BMRGs observed in this study.
